# Supplementary material for: Proteomic Analysis of Disease Stratified Human Pancreas Tissue Indicates Unique Signature of Type 1 Diabetes
Source: PLOS journal article supplement (doi:10.1371/journal.pone.0135663), 2015-08-24
Supplement: S19 (10.1371/journal.pone.0135663.s019) [file journal.pone.0135663.s019]

**S9 Table.** List of genes represented in the network for differentially expressed proteins in T2D versus ND in Supplemental Figure 6.

| <b>Symbol</b>  | <b>Gene Name</b>                                   |
|----------------|----------------------------------------------------|
| ACTA2          | actin, alpha 2                                     |
| ACTN1          | actinin, alpha 1                                   |
| ADAM9          | ADAM metalloproteinase domain 9                    |
| AKR1C3         | aldo-keto reductase family 1, member C3            |
| BMP2           | bone morphogenetic protein 2                       |
| BMP4           | bone morphogenetic protein 4                       |
| CALR           | calreticulin                                       |
| CAT            | catalase                                           |
| CNN1           | calponin 1, basic, smooth muscle                   |
| COL18A1        | collagen, type XVIII, alpha 1                      |
| ENG            | endoglin                                           |
| ERK1/2         | p42/44 mapk                                        |
| FHL2           | four and a half LIM domains 2                      |
| FN1            | fibronectin 1                                      |
| GPIIB-IIIa     | Fibrinogen Receptor                                |
| HLA-A          | major histocompatibility complex, class I, A       |
| IFN Beta       | Interferon beta                                    |
| ITGB1          | integrin, beta 1                                   |
| Lh             | Luteinizing Hormone                                |
| MT-CO2         | cytochrome c oxidase subunit II                    |
| NFkB (complex) | transcription factor nuclear factor $\kappa$ b     |
| NPC2           | Niemann-Pick disease, type C2                      |
| PDCD5          | programmed cell death 5                            |
| PDLIM1         | PDZ and LIM domain 1                               |
| PPAP2B         | phosphatidic acid phosphatase type 2B              |
| PSMD3          | proteasome (prosome, macropain) 26S subunit        |
| PTGER2         | prostaglandin E receptor 2 (subtype EP2)           |
| PTGER4         | prostaglandin E receptor 4 (subtype EP4)           |
| SF1            | splicing factor 1                                  |
| SHARPIN        | SHANK-associated RH domain interactor              |
| STAT1          | signal transducer and activator of transcription 1 |
| TLR4           | toll-like receptor 4                               |
| ZYX            | zyxin                                              |
